# Supplementary material for: Influenza A(H9N2) Virus, Burkina Faso
Source: PubMed Central journal article supplement (PMC5708222; doi:10.3201/eid2312.171294), 2017-12
Supplement: 17-1294-Techapp-s1.pdf [file 17-1294-Techapp-s1.pdf]

# Influenza A(H9N2) Virus, Burkina Faso

## Technical Appendix

### Materials and Methods

#### Genome Amplification and Sequencing

We purified influenza virus RNA from clinical samples by using the Nucleospin RNA Kit (Macherey–Nagel, Duren, Germany). We amplified the complete genome of A/chicken/Burkina\_Faso/17RS93–19/2017(H9N2) virus by using the SuperScript III One-Step RT-PCR System and Platinum Taq High Fidelity (Invitrogen, Carlsbad, CA, USA) as described (1). The sequencing library was prepared by using the Nextera DNA XT Sample preparation kit (Illumina, San Diego, CA, USA) and quantified by using the Qubit dsDNA High Sensitivity Kit (Invitrogen, Carlsbad, CA, USA). The High Sensitivity DNA Analysis Kit (Agilent Technologies, Alpharetta, GA, USA) was used to determine average fragment length. According to the manufacturer’s instructions, the library was sequenced by using Illumina MiSeq (2 × 250-bp paired-end).

#### Illumina Sequencing Data Analysis

FastQC version 0.11.2 (<https://www.bioinformatics.babraham.ac.uk/projects/fastqc/>) was used to assess read quality. Raw data were filtered by removal of reads with >10% of undetermined bases, reads with >100 bases with a Q score <7, and duplicated paired-end reads. Remaining reads were clipped from Nextera XT adaptors (Illumina) with scythe version 0.991 (<https://github.com/vsbuffalo/scythe>) and trimmed with sickle version 1.33 (<https://github.com/najoshi/sickle>). High-quality reads  $\geq 80$  bases were aligned against a reference genome by using BWA version 0.7.12 (2). Picard-tools version 2.1.0 (<http://picard.sourceforge.net>) and GATK version 3.5 (3–5) were used to correct potential errors, realign reads around indels, and recalibrate base quality. LoFreq version 2.1.2 (6) was used to call single-nucleotide polymorphisms. Outputs were used to generate consensus sequences.

#### Phylogenetic Analyses

Consensus sequences of each gene segment of A/chicken/Burkina\_Faso/17RS93–19/2017(H9N2) virus were compared with the most related sequences available in GISAID

(<https://www.gisaid.org/>) and aligned by using MAFFT version 7 (7). Maximum-likelihood phylogenetic trees were obtained by using the best-fit general time-reversible model of nucleotide substitution with gamma-distributed rate variation among sites (with 4 rate categories,  $\Gamma_4$ ) and a heuristic subtree pruning and regrafting branch-swapping search (8) implemented in PhyML version 3.1 (<http://www.atgc-montpellier.fr/phyml/versions.php>). Bootstrap analysis with 100 replicates was performed for each tree to assess support for nodes. Phylogenetic trees were visualized by using FigTree version 1.4.2 (<http://tree.bio.ed.ac.uk/software/figtree/>).

### **Bayesian Analysis**

A time-scaled Bayesian analysis of the hemagglutinin gene was performed by using the Markov chain Monte Carlo method available in BEAST version 1.8.4 ([http://beast.community/2016-06-17\\_BEAST\\_v1.8.4\\_released.html](http://beast.community/2016-06-17_BEAST_v1.8.4_released.html)). A Hasegawa-Kishino-Yano 85 +  $\Gamma_4$  model of nucleotide substitution with 2 data partitions of codon positions (1st and 2nd positions, 3rd position) was used, and base frequencies were unlinked across all codon positions (SRD06 substitution model). We used a relaxed uncorrelated lognormal molecular clock and a Skyride coalescent model in BEAST. Chain lengths were run for 50 million iterations to achieve convergence as assessed by using Tracer version 1.6 (<http://beast.bio.ed.ac.uk/Tracer>). TreeAnnotator version 1.8.4 (9) was used to generate the maximum clade credibility (MCC) phylogenetic tree, and we adopted an appropriate burn-in (10% of trees). The MCC tree was visualized by using FigTree version 1.4.2 (<http://tree.bio.ed.ac.uk/software/figtree/>). SPREAD version 1.0.6 (<https://www.kuleuven.be/aidslab/phylogeography/SPREAD.html>) (10) was used to visualize the phylogeographic reconstruction resulting from the MCC phylogenetic tree and to identify the well-supported rates, calculating the Bayes factors. An animation of viral spread over time is shown in the video (<https://wwwnc.cdc.gov/EID/article/23/12/17-1294-V1.htm>).

### **References**

1. Zhou B, Donnelly ME, Scholes DT, St George K, Hatta M, Kawaoka Y, et al. Single-reaction genomic amplification accelerates sequencing and vaccine production for classical and Swine origin human influenza A viruses. *J Virol*. 2009;83:10309–13. [PubMed http://dx.doi.org/10.1128/JVI.01109-09](http://dx.doi.org/10.1128/JVI.01109-09)
2. Li H, Durbin R. Fast and accurate long-read alignment with Burrows-Wheeler transform. *Bioinformatics*. 2010;26:589–95. [PubMed http://dx.doi.org/10.1093/bioinformatics/btp698](http://dx.doi.org/10.1093/bioinformatics/btp698)

3. McKenna A, Hanna M, Banks E, Sivachenko A, Cibulskis K, Kernytsky A, et al. The Genome Analysis Toolkit: a MapReduce framework for analyzing next-generation DNA sequencing data. *Genome Res.* 2010;20:1297–303. [PubMed http://dx.doi.org/10.1101/gr.107524.110](http://dx.doi.org/10.1101/gr.107524.110)
4. DePristo MA, Banks E, Poplin R, Garimella KV, Maguire JR, Hartl C, et al. A framework for variation discovery and genotyping using next-generation DNA sequencing data. *Nat Genet.* 2011;43:491–8. [PubMed http://dx.doi.org/10.1038/ng.806](http://dx.doi.org/10.1038/ng.806)
5. Van der Auwera GA, Carneiro MO, Hartl C, Poplin R, Del Angel G, Levy-Moonshine A, et al. From FastQ data to high confidence variant calls: the Genome Analysis Toolkit best practices pipeline. *Curr Protoc Bioinformatics.* 2013;43:11.10.1–33. doi: 10.1002/0471250953.bi1110s43.
6. Wilm A, Aw PP, Bertrand D, Yeo GH, Ong SH, Wong CH, et al. LoFreq: a sequence-quality aware, ultra-sensitive variant caller for uncovering cell-population heterogeneity from high-throughput sequencing datasets. *Nucleic Acids Res.* 2012;40:11189–201. [PubMed http://dx.doi.org/10.1093/nar/gks918](http://dx.doi.org/10.1093/nar/gks918)
7. Katoh K, Standley DM. MAFFT multiple sequence alignment software version 7: improvements in performance and usability. *Mol Biol Evol.* 2013;30:772–80. [PubMed http://dx.doi.org/10.1093/molbev/mst010](http://dx.doi.org/10.1093/molbev/mst010)
8. Guindon S, Gascuel O, Rannala B. A simple, fast, and accurate algorithm to estimate large phylogenies by maximum likelihood. *Syst Biol.* 2003;52:696–704. [PubMed http://dx.doi.org/10.1080/10635150390235520](http://dx.doi.org/10.1080/10635150390235520)
9. Drummond AJ, Rambaut A. BEAST: Bayesian evolutionary analysis by sampling trees. *BMC Evol Biol.* 2007;7:214. [PubMed http://dx.doi.org/10.1186/1471-2148-7-214](http://dx.doi.org/10.1186/1471-2148-7-214)
10. Bielejec F, Rambaut A, Suchard MA, Lemey P. SPREAD: spatial phylogenetic reconstruction of evolutionary dynamics. *Bioinformatics.* 2011;27:2910–2. [PubMed http://dx.doi.org/10.1093/bioinformatics/btr481](http://dx.doi.org/10.1093/bioinformatics/btr481)

**Technical Appendix Table 1.** Bayes factor test results for significant nonzero rates of influenza A(H9N2) viruses

| Pairs of locations with Bayes factor >5        | Bayes factor |
|------------------------------------------------|--------------|
| Pakistan-Afghanistan and South Asia            | 3,795.26     |
| Iran-Iraq and Pakistan-Afghanistan             | 1,603.01     |
| Saudi Arabia-Qatar and United Arab Emirates    | 1,436.70     |
| Egypt and Israel-Jordan-Lebanon                | 658.83       |
| Burkina Faso and Morocco                       | 112.11       |
| Morocco and United Arab Emirates               | 58.59        |
| Libya and Saudi Arabia-Qatar                   | 22.48        |
| Pakistan-Afghanistan and United Arab Emirates  | 13.25        |
| Israel-Jordan-Lebanon and United Arab Emirates | 13.23        |
| Pakistan-Afghanistan and Tunisia               | 7.43         |

**Technical Appendix Table 2.** Hemagglutinin gene segments of 16 influenza virus strains used for analysis of influenza A(H9N2) virus, Burkina Faso\*

| Segment ID | Country                 | Collection date | Isolate name                         | Originating laboratory                                                                                   | Submitting laboratory                                  | Authorst†                                                                                                                                                                                                                               |
|------------|-------------------------|-----------------|--------------------------------------|----------------------------------------------------------------------------------------------------------|--------------------------------------------------------|-----------------------------------------------------------------------------------------------------------------------------------------------------------------------------------------------------------------------------------------|
| EPI457491  | Bangladesh              | 2009 Mar 5      | A/duck/Bangladesh/1009/2009          | Institute of Epidemiology<br>Disease Control and Research<br>and Bangladesh National<br>Influenza Centre | Centers for Disease Control<br>and Prevention          | NA                                                                                                                                                                                                                                      |
| EPI557489  | Egypt                   | 2013 Feb 14     | A/chicken/Egypt/NLQP123VD-AR758/2013 |                                                                                                          | Friedrich-Loeffler-Institut                            | Naguib MM, Arafa AM, Selim AA,<br>Hassan MK, Beer M, Harder TC                                                                                                                                                                          |
| EPI355122  | Egypt                   | 2011 Mar 5      | A/chicken/Egypt/11vir4453–280/2011   | Istituto Zooprofilattico<br>Sperimentale Delle Venezie                                                   | Istituto Zooprofilattico<br>Sperimentale Delle Venezie | Monne I, Hussein HA, Fusaro A,<br>Valastro V, Hamoud MM, Rabab A,<br>Noseir S, Capua I, Cattoli G                                                                                                                                       |
| EPI355114  | Egypt                   | 2010 Dec 9      | A/chicken/Egypt/11vir4453–276/2010   | Istituto Zooprofilattico<br>Sperimentale Delle Venezie                                                   | Istituto Zooprofilattico<br>Sperimentale Delle Venezie | Monne I, Hussein HA, Fusaro A,<br>Valastro V, Hamoud MM, Rabab A,<br>Noseir S, Capua I, Cattoli G                                                                                                                                       |
| EPI355106  | Egypt                   | 2011 Mar 5      | A/chicken/Egypt/11vir4453–275/2011   | Istituto Zooprofilattico<br>Sperimentale Delle Venezie                                                   | Istituto Zooprofilattico<br>Sperimentale Delle Venezie | Monne I, Hussein HA, Fusaro A,<br>Valastro V, Hamoud MM, Rabab A,<br>Noseir S, Capua I, Cattoli G                                                                                                                                       |
| EPI301655  | Qatar                   | 2008 Jan 1      | A/chicken/Qatar/4576–4/2008          | Istituto Zooprofilattico<br>Sperimentale Delle Venezie                                                   | Istituto Zooprofilattico<br>Sperimentale Delle Venezie | Fusaro A, Monne I, Salviato A,<br>Valastro V, Schivo A, Amarin NM,<br>Gonzalez C, Ismail MM, Al Blowi MH,<br>Khan OA, Maken Ali AS, Hedayati A,<br>Garcia JG, Ziay GM, Shoushtari A, Al<br>Qahtani KN, Capua I, Holmes EC,<br>Cattoli G |
| EPI301631  | Iran                    | 2009 Jan 1      | A/chicken/Iran/10VIR854–4/2009       | Istituto Zooprofilattico<br>Sperimentale Delle Venezie                                                   | Istituto Zooprofilattico<br>Sperimentale Delle Venezie | Fusaro A, Monne I, Salviato A,<br>Valastro V, Schivo A, Amarin NM,<br>Gonzalez C, Ismail MM, Al Blowi MH,<br>Khan OA, Maken Ali AS, Hedayati A,<br>Garcia JG, Ziay GM, Shoushtari A, Al<br>Qahtani KN, Capua I, Holmes EC,<br>Cattoli G |
| EPI301615  | Iran                    | 2009 Jan 1      | A/chicken/Iran/10VIR854–3/2009       | Istituto Zooprofilattico<br>Sperimentale Delle Venezie                                                   | Istituto Zooprofilattico<br>Sperimentale Delle Venezie | Fusaro A, Monne I, Salviato A,<br>Valastro V, Schivo A, Amarin NM,<br>Gonzalez C, Ismail MM, Al Blowi MH,<br>Khan OA, Maken Ali AS, Hedayati A,<br>Garcia JG, Ziay GM, Shoushtari A, Al<br>Qahtani KN, Capua I, Holmes EC,<br>Cattoli G |
| EPI301607  | Iran                    | 2008 Jan 1      | A/chicken/Iran/10VIR854–5/2008       | Istituto Zooprofilattico<br>Sperimentale Delle Venezie                                                   | Istituto Zooprofilattico<br>Sperimentale Delle Venezie | Fusaro A, Monne I, Salviato A,<br>Valastro V, Schivo A, Amarin NM,<br>Gonzalez C, Ismail MM, Al Blowi MH,<br>Khan OA, Maken Ali AS, Hedayati A,<br>Garcia JG, Ziay GM, Shoushtari A, Al<br>Qahtani KN, Capua I, Holmes EC,<br>Cattoli G |
| EPI301591  | United Arab<br>Emirates | 2008-Jan-01     | A/chicken/Dubai/09vir3771–2/2008     | Istituto Zooprofilattico<br>Sperimentale Delle Venezie                                                   | Istituto Zooprofilattico<br>Sperimentale Delle Venezie | Fusaro A, Monne I, Salviato A,<br>Valastro V, Schivo A, Amarin NM,<br>Gonzalez C, Ismail MM, Al Blowi MH,<br>Khan OA, Maken Ali AS, Hedayati A,<br>Garcia JG, Ziay GM, Shoushtari A, Al<br>Qahtani KN, Capua I, Holmes EC,<br>Cattoli G |

| Segment ID | Country     | Collection date | Isolate name                                         | Originating laboratory                                 | Submitting laboratory                                  | Author†                                                                                                                                                                                                                                 |
|------------|-------------|-----------------|------------------------------------------------------|--------------------------------------------------------|--------------------------------------------------------|-----------------------------------------------------------------------------------------------------------------------------------------------------------------------------------------------------------------------------------------|
| EPI301498  | Jordan      | 2010 Jan 1      | A/chicken/Jordan/436-2/2010                          | Istituto Zooprofilattico<br>Sperimentale Delle Venezie | Istituto Zooprofilattico<br>Sperimentale Delle Venezie | Fusaro A, Monne I, Salviato A,<br>Valastro V, Schivo A, Amarin NM,<br>Gonzalez C, Ismail MM, Al Blowl MH,<br>Khan OA, Maken Ali AS, Hedayati A,<br>Garcia JG, Ziay GM, Shoushtari A, Al<br>Qahtani KN                                   |
| EPI301490  | Jordan      | 2010 Jan 1      | A/chicken/Jordan/436-1/2010                          | Istituto Zooprofilattico<br>Sperimentale Delle Venezie | Istituto Zooprofilattico<br>Sperimentale Delle Venezie | Fusaro A, Monne I, Salviato A,<br>Valastro V, Schivo A, Amarin NM,<br>Gonzalez C, Ismail MM, Al Blowl MH,<br>Khan OA, Maken Ali AS, Hedayati A,<br>Garcia JG, Ziay GM, Shoushtari A, Al<br>Qahtani KN, Capua I, Holmes EC,<br>Cattoli G |
| EPI355392  | Egypt       | 2011 Jan 1      | A/chicken/Egypt/11vir4453-<br>132/VRLCU/2011         | NA                                                     | Istituto Zooprofilattico<br>Sperimentale Delle Venezie | NA                                                                                                                                                                                                                                      |
| EPI355384  | Egypt       | 2011 Mar 5      | A/chicken/Egypt/11vir4453-274/2011                   | NA                                                     | Istituto Zooprofilattico<br>Sperimentale Delle Venezie | NA                                                                                                                                                                                                                                      |
| EPI223115  | Afghanistan | 2009 Jan 1      | A/chicken/Afghanistan/329-7vir09-AFG-<br>Heart6/2009 | NA                                                     | Istituto Zooprofilattico<br>Sperimentale Delle Venezie | Valastro V, Salviato A, Fusaro A,<br>Monne I, Habib M, Ziay G, Garcia J,<br>Cattoli G, Capua I                                                                                                                                          |

\*ID, identification; NA, not available.

†Authors who submitted data may be contacted directly via the GISAID website (<https://www.gisaid.org/>).

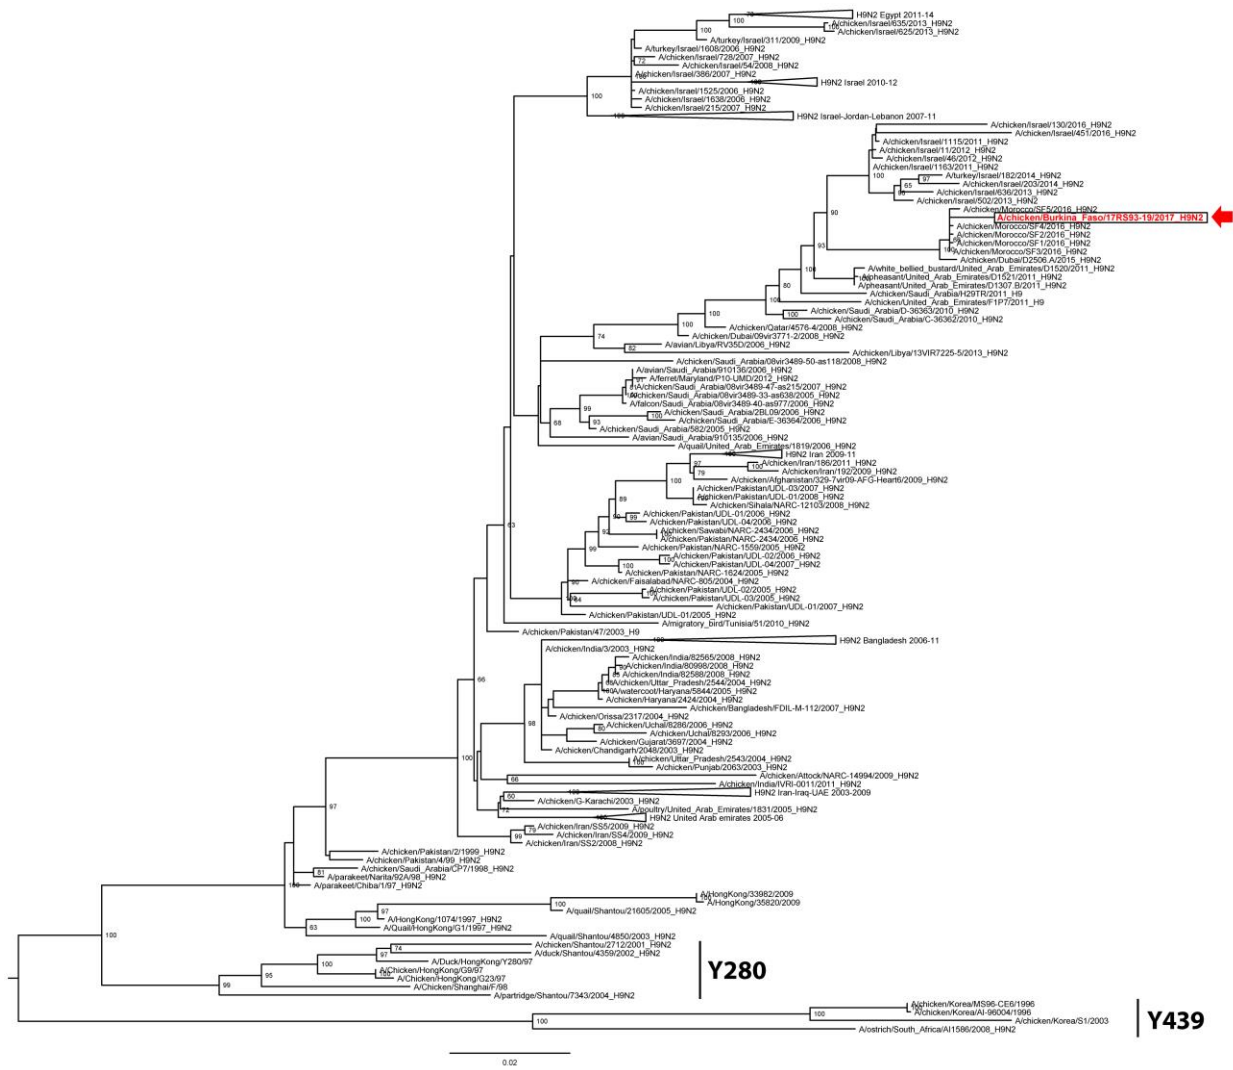

**Technical Appendix Figure 1.** Maximum-likelihood phylogenetic tree of the hemagglutinin gene of influenza A(H9N2) viruses. Influenza A(H9N2) virus from Burkina Faso is indicated in in red. Bootstrap values >60% are indicated next to nodes. Scale bar indicates nucleotide substitutions per site.

- Burkina Faso
- China
- Egypt
- Iran-Iraq
- Israel-Jordan-Lebanon
- Libya
- Morocco
- Pakistan-Afghanistan
- Saudi Arabia-Qatar
- South Asia
- Tunisia
- UAE

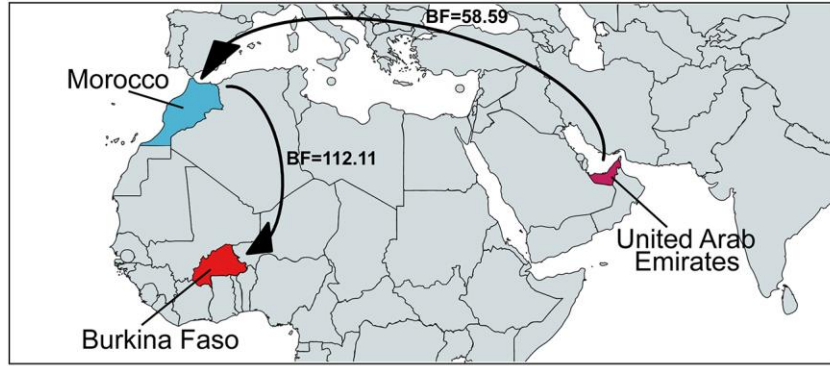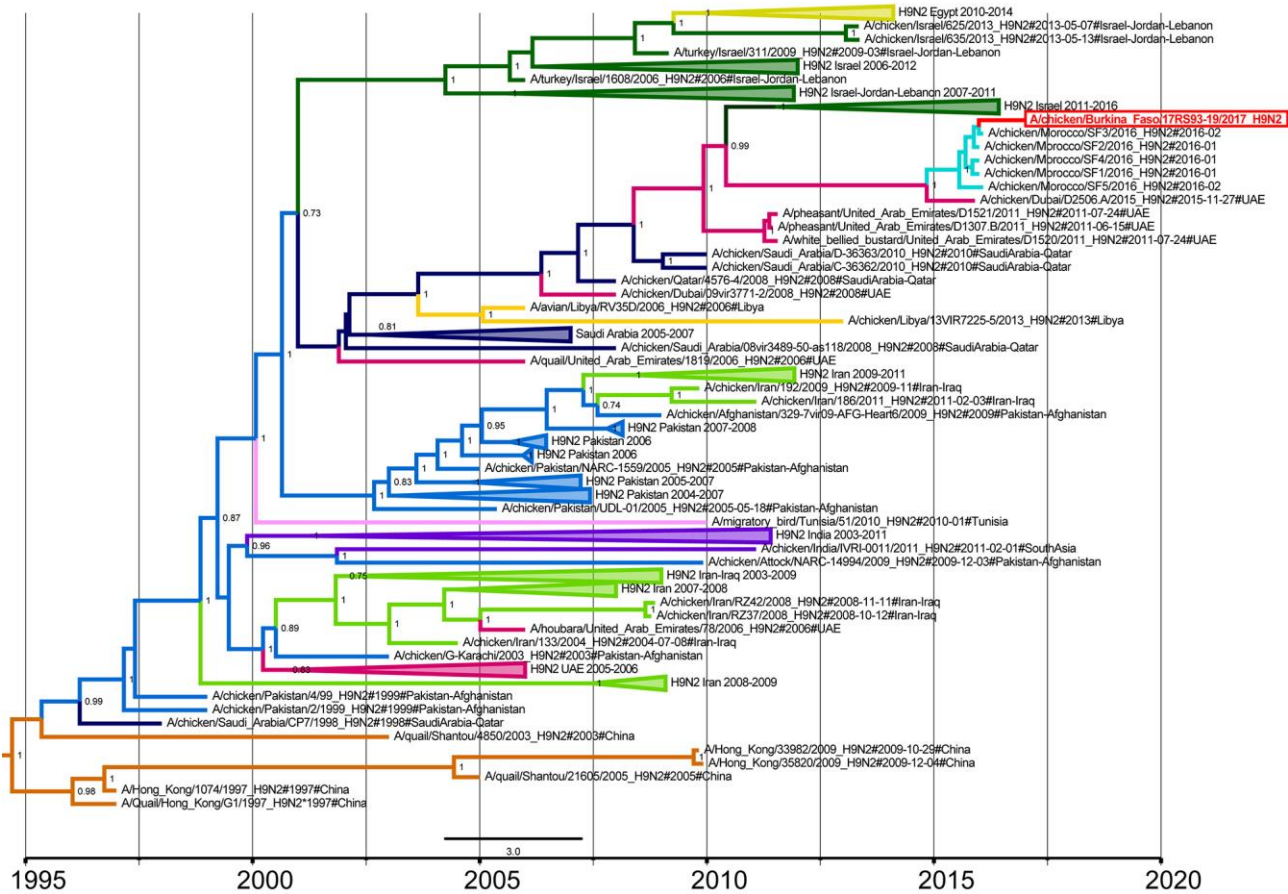

**Technical Appendix Figure 2.** Maximum clade credibility tree showing evolutionary relationships between A/chicken/Burkina Faso/17RS93–19/2017(H9N2) influenza virus (indicated in red) and influenza A(H9N2) viruses isolated in North Africa, the Middle East, and Asia. Posterior probabilities >70 are provided for each node. Color of each branch indicates location where analyzed viruses were collected. Scale bar indicates nucleotide substitutions per site. Map indicates spread of virus from the United Arab Emirates to Morocco and from Morocco to Burkina Faso. Bayes factors (BF) for significant nonzero rates are indicated next to corresponding arrows. UAE, United Arab Emirates.



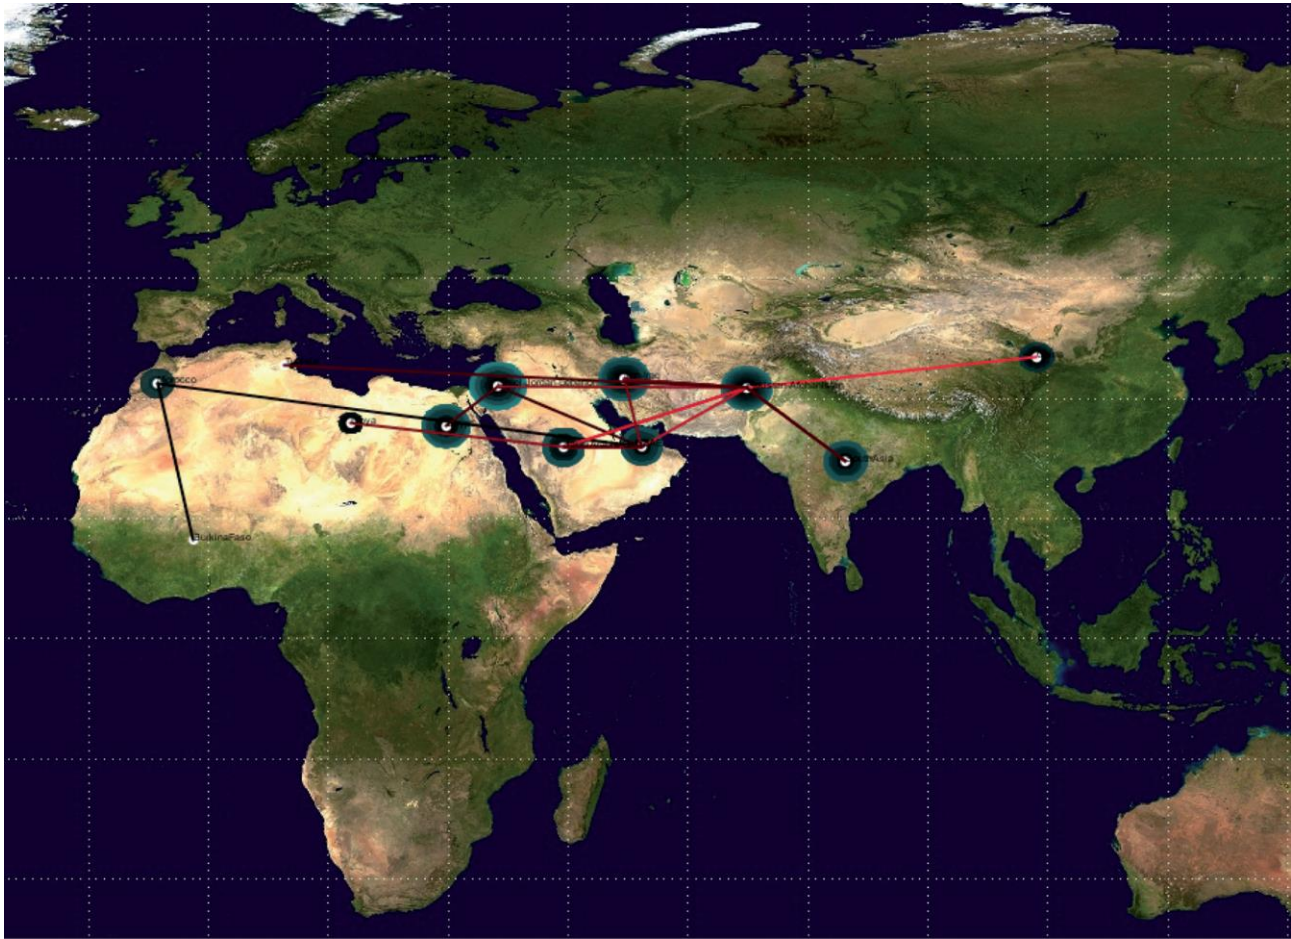

**Technical Appendix Figure 3.** Spread of influenza A(H9N2) virus in Africa and Asia. Phylogeographic reconstruction resulting from the maximum clade credibility phylogenetic tree obtained with SPREAD version 1.0.6 (<https://github.com/phylogeography/SPREAD/issues/7>).
